# Supplementary material
Source: ML conference proceedings conference paper supplement (https://proceedings.mlr.press/v130/yildiz21a.html)
Supplement: Supplementary file 1 [file yildiz21a-supp.pdf]

## A Proof of Theorem 4.1

Let a stationary point  $\boldsymbol{\pi} \in \mathbb{R}_+^n$  of the Augmented Lagrangian (7) be such that:

$$\frac{\partial L_\rho(\boldsymbol{\pi}, \mathbf{W}^k, \mathbf{y}^k)}{\partial \pi_i} = 0 \quad \forall i \in [n] \quad (20a)$$

$$\Leftrightarrow \frac{\partial \mathcal{L}(\mathcal{D}|\boldsymbol{\pi})}{\partial \pi_i} + y_i^k + \rho \frac{\partial D_p(\boldsymbol{\pi}|\tilde{\boldsymbol{\pi}}^k)}{\partial \pi_i} = 0. \quad \forall i \in [n] \quad (20b)$$

Let  $\sigma_i(\boldsymbol{\pi}) = \rho \frac{\partial D_p(\boldsymbol{\pi}|\tilde{\boldsymbol{\pi}}^k)}{\partial \pi_i} + y_i^k$ , for all  $i \in [n]$ . Then, Eq.(20a) is equivalent to:

$$\frac{\partial \mathcal{L}(\mathcal{D}|\boldsymbol{\pi})}{\partial \pi_i} + \sigma_i(\boldsymbol{\pi}) = 0 \quad \forall i \in [n]. \quad (21)$$

Partial derivatives of the negative log-likelihood  $\mathcal{L}(\mathcal{D}|\boldsymbol{\pi})$  are given by:

$$\frac{\partial \mathcal{L}(\mathcal{D}|\boldsymbol{\pi})}{\partial \pi_i} = \sum_{\ell \in W_i} \left( \frac{1}{\sum_{t \in A_\ell} \pi_t} - \frac{1}{\pi_i} \right) + \sum_{\ell \in L_i} \frac{1}{\sum_{t \in A_\ell} \pi_t}, \quad (22)$$

for all  $i \in [n]$ , where  $W_i = \{\ell | i \in A_\ell, c_\ell = i\}$  is the set of observations where sample  $i \in [n]$  is chosen and  $L_i = \{\ell | i \in A_\ell, c_\ell \neq i\}$  is the set of observations where sample  $i \in [n]$  is not chosen. Setting  $\frac{\partial \mathcal{L}(\mathcal{D}|\boldsymbol{\pi})}{\partial \pi_i}$  from Eq. (22) to Eq. (21), we have:

$$\frac{\partial L_\rho(\boldsymbol{\pi}, \mathbf{W}^k, \mathbf{y}^k)}{\partial \pi_i} = \sum_{\ell \in W_i} \left( \frac{1}{\sum_{t \in A_\ell} \pi_t} - \frac{1}{\pi_i} \right) + \sum_{\ell \in L_i} \frac{1}{\sum_{t \in A_\ell} \pi_t} + \sigma_i(\boldsymbol{\pi}) = 0, \quad (23)$$

for all  $i \in [n]$ . Multiplying both sides of Eq. (23) with  $-\pi_i$ ,  $i \in [n]$ , we have:

$$\sum_{\ell \in W_i} \left( \frac{\sum_{j \neq i \in A_\ell} \pi_j}{\sum_{t \in A_\ell} \pi_t} \right) - \sum_{\ell \in L_i} \left( \frac{\pi_i}{\sum_{t \in A_\ell} \pi_t} \right) - \pi_i \sigma_i(\boldsymbol{\pi}) = 0, \quad (24)$$

for all  $i \in [n]$ . Note that  $\sum_{\ell \in W_i} \sum_{j \neq i \in A_\ell} \cdot = \sum_{j \neq i} \sum_{\ell \in W_i \cap L_j} \cdot$  and  $\sum_{\ell \in L_i} \cdot = \sum_{j \neq i} \sum_{\ell \in W_j \cap L_i} \cdot$ . Accordingly, we rewrite Eq. (24) as:

$$\sum_{j \neq i} \sum_{\ell \in W_i \cap L_j} \left( \frac{\pi_j}{\sum_{t \in A_\ell} \pi_t} \right) - \sum_{j \neq i} \sum_{\ell \in W_j \cap L_i} \left( \frac{\pi_i}{\sum_{t \in A_\ell} \pi_t} \right) - \pi_i \sigma_i(\boldsymbol{\pi}) = 0, \quad (25)$$

for all  $i \in [n]$ . Then, the stationarity condition given by Eq.(20a) is equivalent to:

$$\sum_{j \neq i} \pi_j \lambda_{ji}(\boldsymbol{\pi}) - \sum_{j \neq i} \pi_i \lambda_{ij}(\boldsymbol{\pi}) = \pi_i \sigma_i(\boldsymbol{\pi}) \quad \forall i \in [n], \quad (26)$$

where  $\lambda_{ji}(\boldsymbol{\pi})$ ,  $i, j \in [n], i \neq j$  are given by Eq. (12).

It is not evident that Eq.(26) corresponds to the balance equations of an MC as, in general,  $\boldsymbol{\sigma}(\boldsymbol{\pi}) = [\sigma_i(\boldsymbol{\pi})]_{i \in [n]} \neq \mathbf{0}$ . Nevertheless, for  $\sigma_i(\boldsymbol{\pi}) = \rho \frac{\partial D_p(\boldsymbol{\pi}|\tilde{\boldsymbol{\pi}}^k)}{\partial \pi_i} + y_i^k$ ,  $i \in [n]$ , Eq.(26) has the same form as the balance equations in Theorem 4.2 established by Yıldız et al. (2020). By this theorem, a stationary  $\boldsymbol{\pi} \in \mathbb{R}_+^n$  satisfying (20a) is also the stationary distribution of the continuous-time MC with transition rates given by Eq. (10).  $\square$

## B Datasets

**Retinopathy of Prematurity (ROP).** The Retinopathy of Prematurity (ROP) dataset contains  $n = 100$  vessel-segmented retina images with dimensions  $d = 224 \times 224$  (Ataer-Cansızoğlu, 2015). Experts are provided

with two images and are asked to choose the image with higher severity of the ROP disease. Five experts independently label 5941 image pairs; the resulting dataset contains  $m = 29705$  pairwise comparisons. Note that some pairs are labelled more than once by different experts.

**International Conference on Learning Representations (ICLR).** The ICLR Dataset contains abstracts and reviewer ratings of 2561 papers that are submitted to ICLR 2020 conference and are available on OpenReview website (Sun, 2020). We choose the top  $n = 100$  papers, and extract  $d = 768$  numerical features from each abstract using the Deep Bidirectional Transformers (BERT) (Devlin et al., 2019) architecture, pre-trained on the Books Corpus dataset (Zhu et al., 2015) and English Wikipedia. We normalize  $\mathbf{X}$  to have 0 mean and unit variance over samples  $[n]$ . We generate all possible  $m = 120,324(2,248,524)$   $K = 3(4)$ -way rankings w.r.t. the relative order of the average reviewer ratings. We add noise to the resulting rankings following the same process as Movehub-Cost.

**Movehub-Cost.** The Movehub-Cost dataset contains the total ranking of 216 cities w.r.t. cost of living (Blitzer, 2017). Each city is associated with  $d = 6$  numerical features, which are average costs for cappuccino, cinema, wine, gasoline, rent, and disposable income. We normalize  $\mathbf{X}$  to have 0 mean and unit variance over samples  $[n]$ . We select  $n = 50$  cities and generate all  $m = 230,298(2,118,756)$   $K = 4(5)$ -way rankings w.r.t. the relative order of the queried cities in the total ranking. To mimic the real-life noise introduced by human labelling, we apply the following post-processing to the resulting rankings: For each ranking, we sample a value uniformly at random in  $[0, 1]$ . If the value is less than 0.1, we add noise to the ranking by a cyclic permutation of the ranked samples.

**Movehub-Quality.** The Movehub-Quality dataset contains total ranking of the same 216 cities as Movehub-Cost, this time w.r.t. quality of life. Each city is associated with  $d = 5$  numerical features, including overall scores for purchase power, healthcare, pollution, quality of life, and crime. We normalize  $\mathbf{X}$  to have 0 mean and unit variance over samples  $[n]$ . We select  $n = 50$  cities and generate all  $m = 230,298(2,118,756)$   $K = 4(5)$ -way rankings w.r.t. the relative order of the queried cities in the total ranking. We add noise to the rankings following the same process as Movehub-Cost.

**IMDB.** The IMDB Movies Dataset contains IMDB ratings of 14,762 movies, each of which is associated with  $d = 36$  numerical features (Leka, 2016). We normalize  $\mathbf{X}$  to have 0 mean and unit variance over samples  $[n]$ . We select  $n = 50$  movies and generate all possible  $m = 85,583$   $K = 4$ -way rankings w.r.t. the relative order of the ratings of queried movies. We add noise to the resulting rankings following the same process as Movehub-Cost.
